# Supplementary material
Source: PubMed Central journal article supplement (PMC539743)
Supplement: pnas_101_52_18228__1.pdf [file pnas_101_52_18228__1.pdf]

MQITNKIHFNRNIRGDI FGGLTAAVIALPMALAFGVASGAGAEAGLWGAVLVGFFAALFGGTPTLISEPTGPMTVVMTAVI  
AHFTASAATPEEGLAIAFTVVMAGVFQII FGSLKLGKYVTMMPYTVISGFMSGIGIILVILQLAPFLGQASPGGGVIGT  
LQNLPTLLSNIQPGETALALGTVAIIWFMPEKFKKVI PPQLVALVLGTVIAFFVFPPEVSDLRRIGEIRAGFPELVRPSF  
SPVEFQRMILDAAVLGMLGCIDALLTSVVADSLTRTEHNSNKELIGQGLGNLFSGLFGGIAGAGATMGTVVNIQSGGRTA  
LSGLVRAFVLLVVILGAASLTATIPLAVLAGIAFKVGVDIIDWSFLKRAHEISPKGALIMYGVILLTVLVDLIVAVGVGV  
FVANVLTIERMSNLQSEKVQTVSDADDNIRLTTTEKRWLDEGQGRVLLFQLSGPMIFGVAKAIAREHNAMGDCDALVFDI  
GEVPHMGVTASLALENAIEEALDKERQVYIVGAAGQTRRRLEKLLKLFKRVPPDKCLMSREEALKNAVLGIYPHLADGVTA  
PSSEMG
